# Supplementary material
Source: PubMed Central journal article supplement (PMC6731772)
Supplement: NIHMS599710-supplement-supp.pdf [file NIHMS599710-supplement-supp.pdf]

*Mechanistic Insights into Nitrite-Induced Cardioprotection Using  
an Integrated Metabonomic-Proteomic Approach*

**Online Data Supplement**

**Supplemental Methods**

**Animal Care and Nitrite Administration**

Male Wistar rats (Harlan, Indianapolis, IN; 250-350 g) were allowed food (2018 rodent diet, Harlan Teklad) and water *ad libitum* and were kept on a 12 h/12 h light/dark cycle with at least 10 days of local vivarium acclimatization prior to experimental use. Rats were given a single intraperitoneal (i.p.) injection of sodium nitrite (SigmaAldrich, St. Louis, MO) dissolved in phosphate buffered saline (PBS, pH 7.4) at doses of 0, 0.1, 1.0 and 10 mg/kg body weight for nitrite bolus experiments. In order to avoid potential confounding effects of chronobiological changes of endogenous nitrite, nitrate and nitros(yl)ation levels in time-course experiments, nitrite injections were staggered such that organ harvest for each time point after nitrite administration was conducted at the same absolute time-of-day (thus, all animals were in the same chronobiological phase at the time of organ harvest).

**Organ Perfusion and Homogenization**

At 0, 2, 5, 10 and 30 min or 1, 3, 12, 24, 36, and 48 h post-application of nitrite, heparinized (0.07 units/g i.p.) animals were anesthetized with diethylether (2 min) and euthanized by cervical dislocation. Organs were perfused free of blood via retrograde perfusion with air-equilibrated PBS (50mM, pH 7.4) supplemented with *N*-ethylmaleimide (NEM)/ EDTA (10mM/2.5mM) for metabonomic measurements. The heart was excised, washed in perfusion buffer, blotted dry on filter paper, weighed, and homogenized immediately in ice-cold NEM/EDTA-containing perfusion buffer (5:1 v/w) For proteomic analysis of whole heart homogenate, animals were perfused with air-equilibrated PBS containing only EDTA (2.5 mM), and the heart was homogenized in PBS (50 mM, pH 7.4) buffer containing 2.5 mM EDTA, 1 mM DTT, 1% NP-40, phosphatase inhibitors (consisting of 10 mM sodium fluoride, 10 mM sodium pyrophosphate, 2 mM sodium orthovanadate, and 50 mM  $\beta$ -glycerophosphate, final concentrations), and Complete™ protease inhibitor cocktail (Roche Diagnostics, Indianapolis, IN). For either type of analysis, organs were homogenized on ice using a polytron homogenizer. Proteomic sample homogenates were incubated on ice for 30 min to facilitate solubilization, after which they were cleared of insolubles by centrifugation at 12,000 X g for 15 min at 4 °C, aliquoted, and stored at -80 °C. Prior to use, proteomic samples were thawed on ice and assayed for protein concentration using the BCA Assay™ (Pierce, Rockford, IL). An equal protein quantity from

## ***Mechanistic Insights into Nitrite-Induced Cardioprotection Using an Integrated Metabonomic-Proteomic Approach***

each of the samples derived from each of the 3 animals at a particular dose were pooled, then dissolved and clarified in Destreak™ IEF buffer (GE Healthcare, Piscataway, NJ), as described below for mitochondrial sample preparation.

### **Isolated Perfused Heart Preparation**

Hearts were isolated and perfused *ex vivo* in the Langendorff mode according to a previously described protocol.<sup>19</sup> Briefly, the thorax was rapidly opened, the heart excised, and arrested in ice-cold buffer. Retrograde perfusion was initiated via the aortic root at a constant coronary perfusion pressure of 70 mmHg at 37 °C. The coronary perfusate consisted of a modified Krebs-Henseleit buffer containing in mM: 118 NaCl, 5.3 KCl, 2.0 CaCl<sub>2</sub>, 1.2 MgSO<sub>4</sub>, 0.5 EDTA, and 25 NaHCO<sub>3</sub>. The perfusate was equilibrated with 95% O<sub>2</sub> and 5% CO<sub>2</sub> to yield a pH of 7.4 at 37 °C. A water-filled balloon custom-made from polyvinyl chloride film was inserted through the mitral valve into the left ventricle via an incision in the left atrium. The balloon was connected to a pressure transducer (MLT 844, ADInstruments, Colorado Springs, CO) for continuous recording of left ventricular pressure and HR. The balloon was inflated until an LV end-diastolic pressure (EDP) of 10 mm Hg was achieved, and the balloon volume was then held constant so that changes in EDP reflected changes in LV diastolic compliance. Isovolumic contractile data were collected on-line using a MacLab data acquisition system (ADInstruments). Hearts were stabilized for 15 min and subsequently subjected to 15 min of zero-flow ischemia, followed by 30 min of reperfusion. LVDevP (the difference between systolic pressure and EDP), the minimum and maximum values within a beat of the first derivative of left ventricular pressure (+dP/dt and -dP/dt), and RPP (product of LVDevP and HR) were calculated off-line.

### **Metabonomic and Redox Measurements**

Nitroso and nitrosyl compounds were measured by group-specific denitrosation after injection of the biological sample into a triiodide-containing reaction mixture continuously purged with nitrogen. Evolved NO was quantified in the gas phase using an ozone-based chemiluminescence detector (CLD 77am sp; EcoPhysics, Ann Arbor, MI). Nitrite and nitrate concentrations were quantified simultaneously by ion chromatography (ENO20; Eicom, San Diego, CA). Ascorbate and dehydroascorbate and reduced and oxidized glutathione were measured essentially as described<sup>18</sup> (see Online Data Supplement). Protein carbonyls were quantified using a commercially available ELISA (Northwest LLC, Vancouver, WA). Ascorbate and dehydroascorbate were measured as described by Carr, et al., at a wavelength of 524 nm using a Spectramax M5 plate reader (Molecular Devices, Sunnyvale, CA), in which ascorbic acid was

## ***Mechanistic Insights into Nitrite-Induced Cardioprotection Using an Integrated Metabonomic-Proteomic Approach***

oxidized to dehydroascorbic acid (DHA) by the addition of 2,6-dichlorophenolindophenol (DCIP) and incubated with the color producing reagent 2,4-dinitrophenylhydrazine (DNPH). Control samples were processed with water, rather than DCIP, prior to incubation with DHPH. Total ascorbate was determined as the raw absorbance difference between the DCIP-treated samples and control samples fitted to an ascorbic acid standard curve. A blank in which the color producing reagent, 2,4-dinitrophenylhydramine (DNPH) was added only after the reaction was terminated by the addition of sulfuric acid was used to account for tissue-specific background coloration of the assay solution. Ascorbic acid tissue concentration was found by determining the absorbance difference between the DCIP-treated sample and the blank and fitting it to the ascorbic acid standard curve.

### **Isolation Mitochondria and Post-mitochondrial Cytoplasm from the Heart**

Hearts were perfused, isolated, washed, weighed and homogenized as described, except that homogenization was conducted in mitochondrial purification buffer (MPB, consisting of PBS, pH 7.4, supplemented with 50 mM sucrose, 200 mM mannitol, 5 mM potassium phosphate, 5 mM MOPS, 1 mM EGTA, 0.1% BSA, Complete™ protease inhibitors (Roche), and the above phosphatase inhibitor mix. Homogenates were incubated on ice for 30 min, after which homogenates from replicate animals within each treatment group were pooled, clarified by centrifugation at 1,500 X g for 10 min at 4 °C, then subjected to centrifugation at 15,000 X g for 20 min at 4 °C to separate crude mitochondria (pellet) from post-mitochondrial cytoplasm (supernatant). Pellets were washed twice by resuspension in 5 ml of fresh MPB and re-centrifuged at 15,000 X g for 20 min at 4 °C. Pellets were dissolved directly in Destreak™ IEF buffer (GE Healthcare), incubated at room temperature for 1 h to enhance solubilization, clarified by centrifugation at 21,000 X g, and assayed for protein concentration using the 2D-Quant Kit™ (GE Healthcare). Post-mitochondrial cytoplasmic supernatants were assayed for protein concentration using the BCA Assay™, equal amounts were precipitated using the 2D Clean-up Kit™ (BioRad) and dissolved in Destreak™ IEF buffer.

### **2D-PAGE Analysis**

IEF for 2D-PAGE was conducted as follows: 17 cm ReadyStrips™ IPG strips (BioRad) of pI 3-10 or 4-7 were subjected to active rehydration overnight with normalized aliquots of protein in Destreak™ IEF buffer, supplemented with 0.02% pI 3-10 ampholytes (BioRad). Isoelectric focusing was performed in a Protean™ IEF cell (Bio-Rad) at 120 V for 1 h, 300 V for 30 min, a

## ***Mechanistic Insights into Nitrite-Induced Cardioprotection Using an Integrated Metabonomic-Proteomic Approach***

linear increase up to 3500 V over 3 h, up to 5000 V over 10 min, and then at 8000 V steadily, until a total of 67,000 Vh had elapsed. Following IEF, IPG strips were subjected to reduction, alkylation, and equilibration for the second dimension, using Equilibration Buffers I & II (BioRad) for 30 min each, then SDS-PAGE, using 10% polyacrylamide ReadyGels™ (Bio-Rad). After staining, gels were imaged using a VersaDoc™ 3000 (BioRad, Hercules, CA). Protein transfer to PVDF membranes was accomplished using a Genie™ apparatus (Idea Scientific, Minneapolis, MN). Chemiluminescence was captured using a VersaDoc™ 3000 and analyzed using QuantityOne™ software.

### **In-Gel Digestion and MALDI-TOF Mass Spectrometry**

In-gel digestion was conducted as previously described, by a modified procedure originally based on the work of Shevchenko, et al. [Shevchenko A, Wilm M, Vorm O, Mann M: Mass spectrometric sequencing of proteins from silver-stained polyacrylamide gels. *Anal Chem* 1996, 68:850–858]. Briefly, the protein spots of interest were punch-excised using wide-orifice pipet tips, and were destained either with Commassie destain (100 mM ammonium bicarbonate (ABC), pH 9/50% acetonitrile(ACN)) or with silver destain (the potassium ferrocyanide-based reagents of the ProteoSilver™ Plus kit, SigmaAldrich, St. Louis, MO). The gel pieces were washed four times with alternating solutions of 100 mM ABC (pH 9), 100 mM ABC (pH 9)/ 50% ACN, and 100% ACN, swelled in digestion solution (approximately 10 ng Trypsin Gold (Promega, Madison, WI) in 50 mM ABC (pH 9)/ 10% ACN) and incubated overnight at 37 °C. Peptides were extracted twice with alternating solutions of 20 mM ABC, (pH 9), 1% trifluoroacetic acid (TFA)/ 50% ACN, and 100% ACN, and all extraction supernatants were pooled and spun to dryness in a SpeedVac™ (Thermo-Savant, Waltham, MA). For acquisition of mass spectra, instrument laser intensity was adjusted to be approximately 3% above the threshold value. Signals from 200 to 300 laser shots were summed for each mass spectrum. External calibration of the spectra was achieved using Bruker peptide standards, and internal calibration was achieved to within 50 ppm using the masses of known peptide ions.

### **MALDI-TOF MS Data Analysis and Peptide Mass Fingerprinting**

Mascot™ peptide mass fingerprinting analysis was conducted against the SwissProt or NCBI non-redundant protein databases using the following parameters: a) species, rat or mouse b) trypsin digestion with up to 3 missed cleavages c) +/- 70 ppm error d) cysteine carbamidomethylation as a fixed modification, e) methionine oxidation as a variable

## ***Mechanistic Insights into Nitrite-Induced Cardioprotection Using an Integrated Metabonomic-Proteomic Approach***

modification. Peak lists were submitted in batch to Mascot™ using the BUDSS software (written in-house).

### **Preparation of Peptides from Heart Homogenates for Phosphopeptide Enrichment and Mass Spectrometry**

In order to avoid potential artifactual chemical modifications and losses associated with peptides extracted from stained gels, peptides were produced directly from heart homogenates in the following manner. Protein was precipitated from pooled vehicle-treated (control) and pooled nitrite-treated heart homogenates by adding 8 vol. ice-cold acetone / 1 vol. 100% trichloroacetic acid and incubating overnight at -20 °C. Precipitates were pelleted by centrifugation at 21,000 g for 10 min at 4 °C; pellets were then washed with 100% ice-cold acetone. Protein was solubilized and subjected to reduction of disulfides by incubation in a solution of 50 mM Tris(hydroxymethyl)aminomethane (Tris, pH 8.8) containing 7M urea/ 2 M thiourea/ 10 mM dithiothreitol (DTT) for 4 h at room temperature (RT) with gentle rocking. Thiol alkylation was performed by the addition of 20 mM iodoacetamide and incubation at RT in the dark for 30 min followed by quenching with 50 mM DTT. Samples were diluted 2-fold with 50 mM Tris (pH 8.8)/ 20% ACN and subjected to digestion with Lys-C endoproteinase (Pierce) for 10 h at RT using a 1/250 (wt/wt) enzyme to substrate ratio. This was followed by a second phase of digestion, after a 2.5-fold dilution with 50 mM Tris (pH 8.8)/ 10% ACN, using trypsin (Promega) at a 1/50 (wt/wt) enzyme to substrate ratio and incubating at RT overnight. Digests were spun to dryness in a SpeedVac™.

### **Phosphopeptide Enrichment**

Phosphopeptides were enriched from samples using a 2-stage process of calcium phosphate precipitation [Zhang X, Ye J, Jensen ON, Roepstorff P: Highly Efficient Phosphopeptide Enrichment by Calcium Phosphate Precipitation Combined with Subsequent IMAC Enrichment. Mol Cell Proteomics. 2007 6(11): 2032-42.], followed by titanium dioxide enrichment [Thingholm TE, Jørgensen TJ, Jensen ON, Larsen MR: Highly selective enrichment of phosphorylated peptides using titanium dioxide. Nat Protoc. 2006;1(4):1929-35.]. Dried samples were resuspended in water followed by the addition of ammonium hydroxide until the solutions achieved a pH of 10. Dibasic sodium phosphate was added to a final concentration of 20 mM, followed by calcium chloride (CaCl<sub>2</sub>) to a final concentration of 80 mM. Insoluble precipitates were pelleted by centrifugation at 21,000 g for 10 min, washed with 80 mM CaCl<sub>2</sub>, and dissolved in 1% TFA (or in 5% formic acid (FA)/ 3% ACN, for analysis directly by LC-MS). Peptides

## ***Mechanistic Insights into Nitrite-Induced Cardioprotection Using an Integrated Metabonomic-Proteomic Approach***

were desalted by C18 solid phase extraction using Supelclean™ LC-18 devices (SigmaAldrich), using 1% TFA, 0.1% TFA, and 80% ACN/ 0.1% TFA/ 20 mg/ml dihydroxybenzoic acid (DHB) as the binding, washing, and elution solutions, respectively. Eluted peptides were then immediately subjected to titanium dioxide phosphopeptide enrichment using MonoTip™ pipette tips (GL Sciences, Torrance, CA), wherein peptides were bound to the tips in 80% ACN/ 0.1% TFA/ 20 mg/ml DHB solution, washed 3 times with 80% ACN/ 0.1% TFA/ 20 mg/ml DHB solution, washed 7 times with 80% ACN/ 0.1% TFA solution, and eluted with 75 mM ammonium hydroxide. Samples were prepared for LC-MS by the addition of 5% FA/ 3% ACN.

### **Nanoflow HPLC-coupled Tandem Mass Spectrometry**

LC-MS was performed on the phosphopeptide-enriched samples using a nanoAcquity UPLC™ capillary high-performance liquid chromatography system (Waters Corp., Milford, MA) coupled to an LTQ-Orbitrap™ hybrid mass spectrometer (ThermoFisher Scientific, San Jose, CA) equipped with a TriVersa NanoMate ion source (Advion, Ithaca, NY). Sample concentration and desalting were performed online using a nanoAcquity UPLC™ trapping column (180µm x 20mm, packed with 5 µm, 100 Å Symmetry C18 material, Waters Corp.) at a flow rate of 15 µL/ min for 1 min. Separation was accomplished on a nanoAcquity UPLC™ capillary column (100µm x 100mm, packed with 1.7µm, 130 Å BEH C18 material, Waters Corp.). A linear gradient of A and B buffers (buffer A: 3% ACN/ 0.1% FA; buffer B: 97% ACN/ 0.1% FA) from 7% to 45% buffer B over 124 min was used at a flow rate of 0.5 µL/ min to elute peptides into the mass spectrometer. Columns were washed and re-equilibrated between LC-MS experiments. Electrospray ionization was carried out at 1.7 kV using the NanoMate, with the LTQ heated capillary set to 150 °C. Mass spectra were acquired in the Orbitrap in the positive-ion mode over the m/z range of 300–2000 at a resolution of 60,000 (approximately 1 mass spectrum/ s). Mass accuracy after internal calibration was within 4 ppm. Simultaneously, tandem MS (MS/MS) were acquired using the LTQ for the five most abundant, multiply-charged species in the mass spectrum with signal intensities of >8000 NL, using multistage activation that targeted the ions of interest plus those resulting from the potential prompt neutral loss of one or multiple phosphoric acid moieties. MS/MS collision energies were set at 35%, using helium as the collision gas, and MS/MS were acquired over a range of m/z values dependent on the precursor ion. Dynamic exclusion was set such that MS/MS for each species was acquired a maximum of twice. All spectra were recorded in profile mode for further processing and analysis.

***Mechanistic Insights into Nitrite-Induced Cardioprotection Using  
an Integrated Metabonomic-Proteomic Approach***

**LC-MS Data Analysis**

Xcalibur and Proteome Discoverer software (ThermoFisher Scientific) were used for MS and MS/MS data analysis, while peptide and protein assignments were conducted using Mascot™ to search against the rodent species subset of the SwissProt database (UniProt release 14.3) employing a error window of 6ppm on the precursor ions and 0.6 Da on the fragment ions. Fixed modifications were set to include carbamidomethylation of cysteine; variable modifications were set to include oxidation of methionine and phosphorylation of serine, threonine, and tyrosine residues. Mascot™ results were parsed, filtered, and analyzed using Scaffold (Proteome Software, Portland, OR). Potential phosphopeptides identified by Mascot™ were verified and refined by manual interpretation of the original spectra.

*Mechanistic Insights into Nitrite-Induced Cardioprotection Using  
an Integrated Metabonomic-Proteomic Approach*

Supplemental Figures

**Experimental Schema**

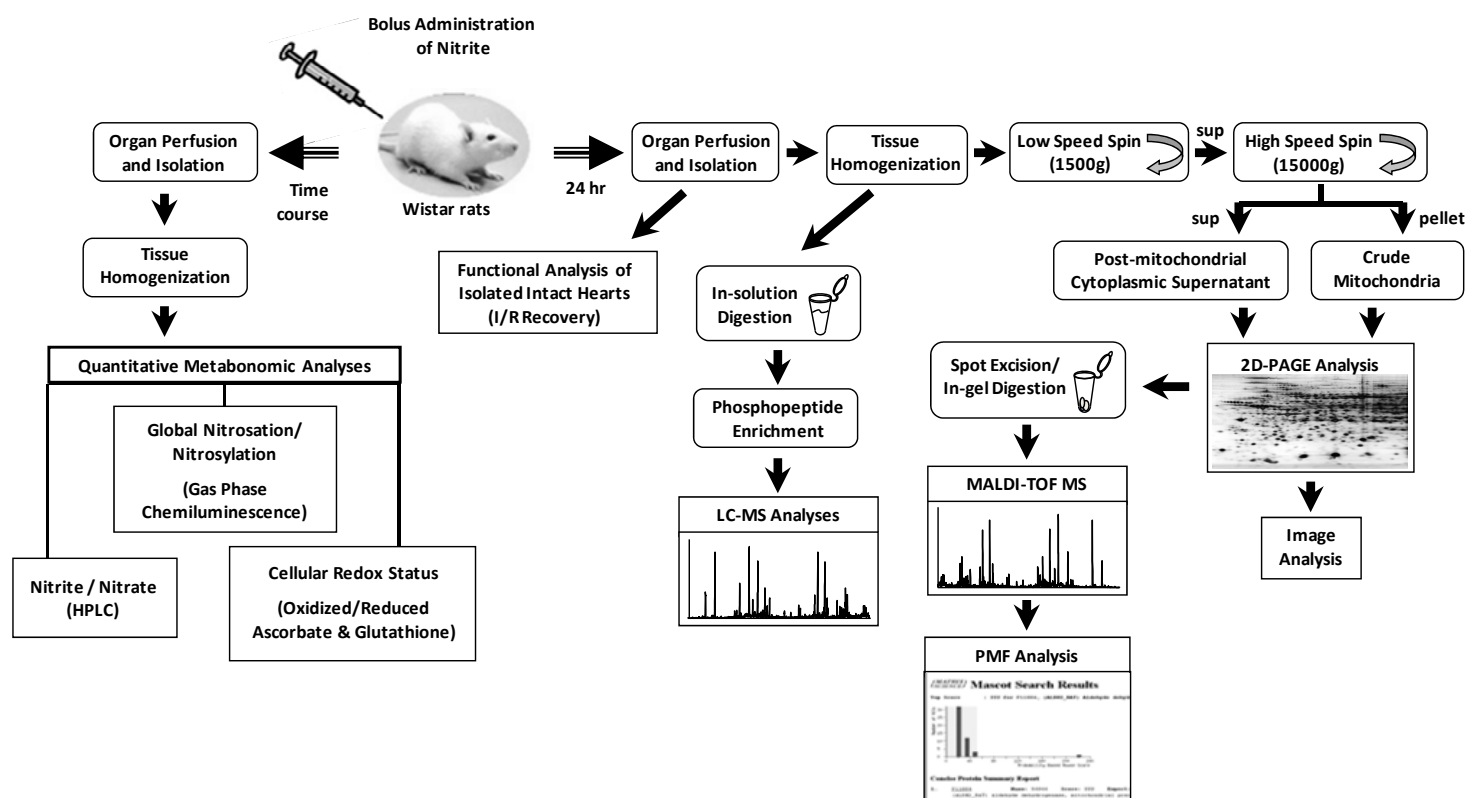

**Figure S-1. Schema depicting the experimental design to study the effects of nitrite exposure on the heart using metabonomic, proteomic, and functional analyses.** Age-matched male Wistar rats were administered a systemic bolus of nitrite through intraperitoneal injection to mimic an acute exposure event such as those caused by brief bouts of exercise, consumption of nitrate-rich vegetables, or other physiological process that leads to sharp increases in circulating nitrite levels. Hearts (as well as other organs) were isolated various times afterwards, homogenized, and either were subjected to quantitative metabonomic analysis, consisting of measurement of tissue nitrite and nitrate levels, nitrosation and nitrosylation, and cellular redox status, or were subjected to separation into mitochondrial and post-mitochondrial fractions by differential centrifugation, followed by 2D-PAGE, protein and protein modification-specific staining, in-gel digestion, MALDI-TOF MS and PMF analyses. Phosphopeptides enriched from in-solution digested tissue homogenate were analyzed by LC-MS. Alternatively, intact hearts were functionally assessed in response to ischemia/reperfusion *ex vivo* under Langendorff perfusion.



*Mechanistic Insights into Nitrite-Induced Cardioprotection Using  
an Integrated Metabonomic-Proteomic Approach*

**Heart Mitochondria from Rats Exposed to a Bolus of Nitrite**

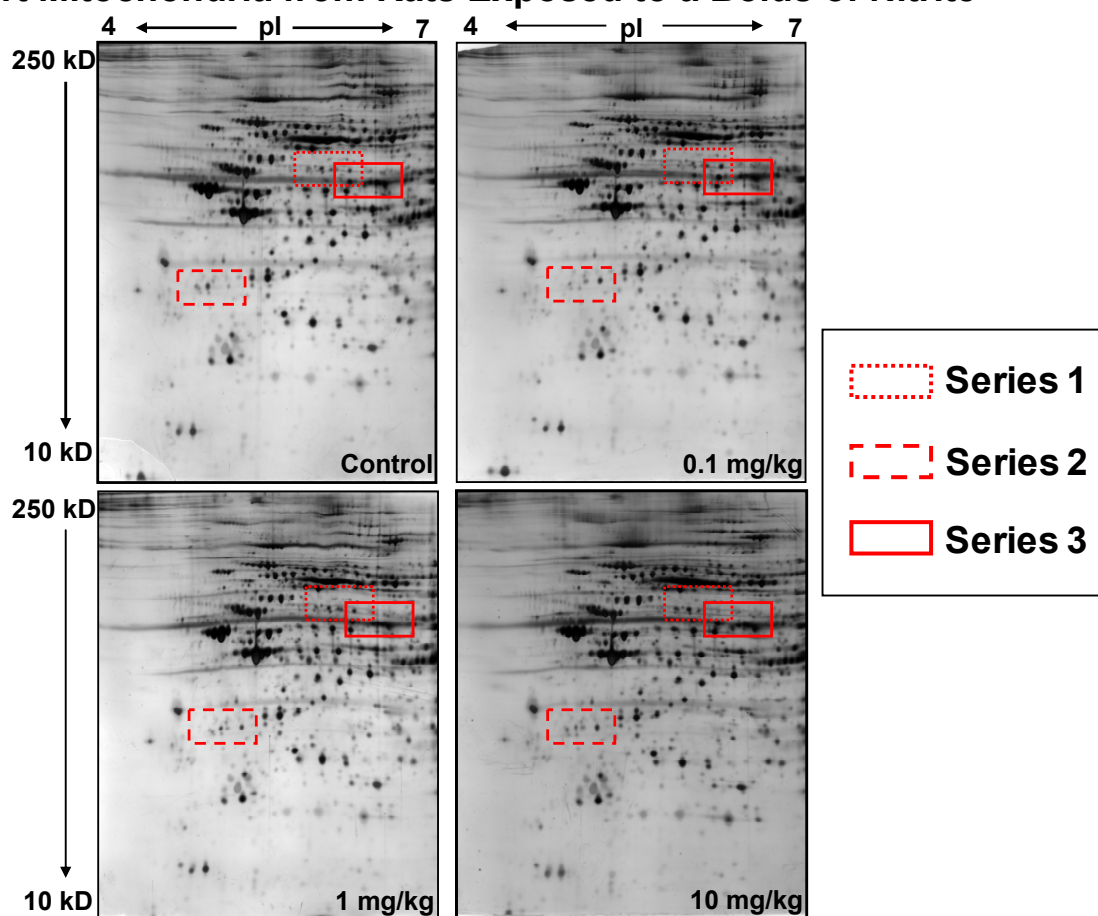

**Figure S-2. Three regions of the cardiac mitochondrial 2D-PAGE proteome displaying pronounced changes in spot series.** Isolated cardiac mitochondria from animals administered a bolus dose of 0.1, 1.0, 10 mg/kg nitrite, or saline (control) were subjected to 2D-PAGE analysis (as in Figure 3A), here using IEF over the pI range 4 to 7, as indicated, in order to expand regions displaying pronounced spot changes between levels of nitrite exposure. Regions boxed in red contain spot series showing pronounced changes (series 1, 2, 3, dotted, dashed, and solid lines, respectively) and are shown enlarged in Figure 3B.

*Mechanistic Insights into Nitrite-Induced Cardioprotection Using  
an Integrated Metabonomic-Proteomic Approach*

**Heart Post-mitochondrial Sup. from Rats Exposed to a Bolus of Nitrite**

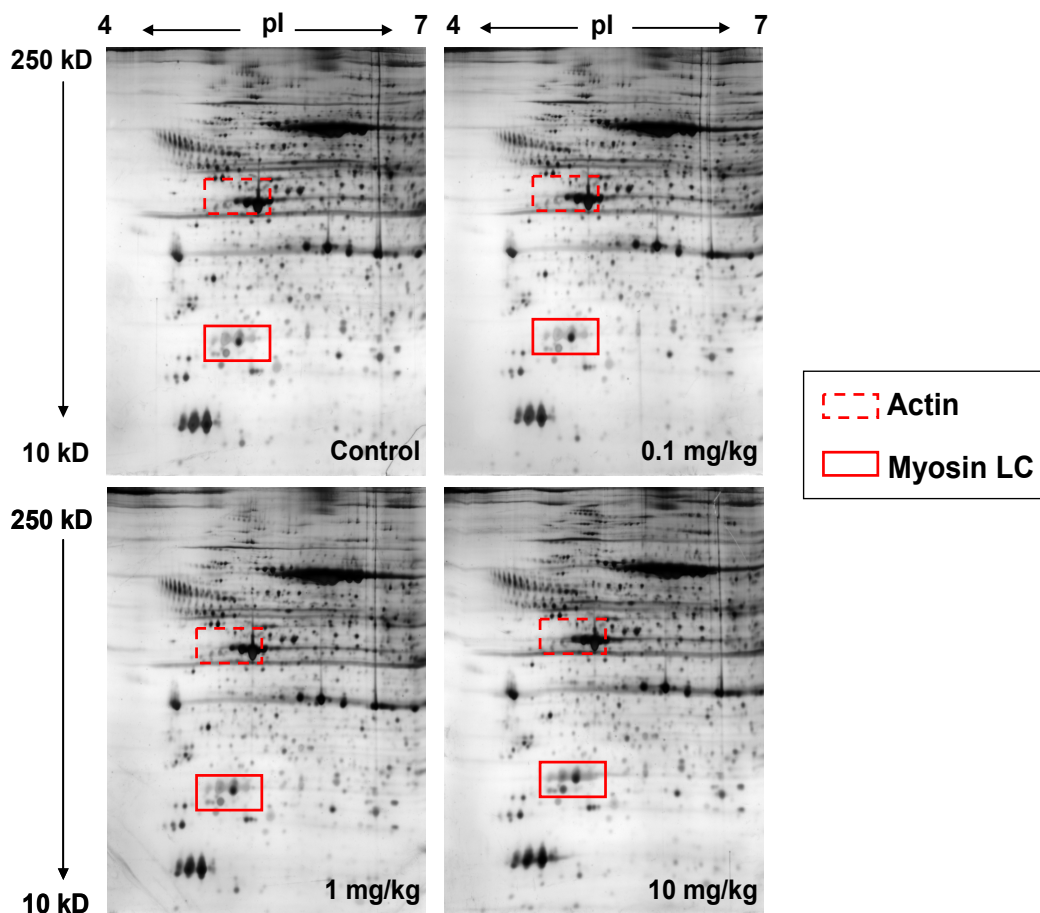

**Figure S-3. Brief nitrite exposure induces long-term changes to structural/contractile proteins in the myocardium.** Post-mitochondrial cytoplasmic supernatant purified by differential centrifugation from the cardiac tissue of animals administered a bolus dose of 0.1, 1.0, 10 mg/kg nitrite, or saline (control), as described, was analyzed by 2D-PAGE over the pI range 4 to 7 and molecular weight range of 250 kDa to 10 kDa. Regions boxed in red contain actin and myosin LC1 spot series that displayed pronounced changes in response to nitrite administration and are shown enlarged in Figure 4A and B.

*Mechanistic Insights into Nitrite-Induced Cardioprotection Using  
an Integrated Metabonomic-Proteomic Approach*

## Supplemental Tables

**Table 1. Peptide Mass Fingerprint Analysis of Mitochondrial and Post-mitochondrial Cytoplasm 2D-gel Spots**

| SwissProt ID | Accession Number | Protein Name                                              | Mascot Score | Expect Value |
|--------------|------------------|-----------------------------------------------------------|--------------|--------------|
| A1AT_RAT     | P17475           | Alpha-1-antiproteinase                                    | 99           | 2.40E-06     |
| A1I3_RAT     | P14046           | Alpha-1-inhibitor 3                                       | 201          | 1.60E-16     |
| ACON_RAT     | Q9ER34           | Aconitate hydratase, mitochondrial                        | 218          | 3.10E-18     |
| ACTC_MOUSE   | P68033           | Actin, alpha cardiac muscle 1                             | 169          | 2.50E-13     |
| AFAM_RAT     | P36953           | Afamin                                                    | 222          | 1.20E-18     |
| AL9A1_RAT    | Q9JLJ3           | 4-trimethylaminobutyraldehyde dehydrogenase               | 102          | 1.20E-06     |
| ALBU_RAT     | P02770           | Serum albumin                                             | 260          | 2.00E-22     |
| ALDH2_RAT    | P11884           | Aldehyde dehydrogenase, mitochondrial                     | 205          | 6.20E-17     |
| ANXA6_RAT    | P48037           | Annexin A6                                                | 234          | 7.80E-20     |
| APOA1_RAT    | P04639           | Apolipoprotein A-I                                        | 81           | 0.00018      |
| ATPA_RAT     | P15999           | ATP synthase subunit alpha, mitochondrial                 | 95           | 6.00E-06     |
| ATPB_RAT     | P10719           | ATP synthase subunit beta, mitochondrial                  | 182          | 1.20E-14     |
| ATRX_MOUSE   | Q61687           | Transcriptional regulator ATRX                            | 58           | 0.029        |
| BCAT2_RAT    | O35854           | Branched-chain-amino-acid aminotransferase, mitochondrial | 95           | 6.20E-06     |
| CAH3_RAT     | P14141           | Carbonic anhydrase 3                                      | 112          | 1.20E-07     |
| CALR_RAT     | P18418           | Calreticulin                                              | 156          | 4.90E-12     |
| CATA_RAT     | P04762           | Catalase                                                  | 197          | 3.90E-16     |
| CH60_MOUSE   | P63038           | 60 kDa heat shock protein, mitochondrial                  | 290          | 2.00E-25     |
| CI068_RAT    | Q6AYJ3           | Uncharacterized protein C9orf68 homolog                   | 60           | 0.018        |

*Mechanistic Insights into Nitrite-Induced Cardioprotection Using  
an Integrated Metabonomic-Proteomic Approach*

| <b>SwissProt ID</b> | <b>Accession Number</b> | <b>Protein Name</b>                                   | <b>Mascot Score</b> | <b>Expect Value</b> |
|---------------------|-------------------------|-------------------------------------------------------|---------------------|---------------------|
| <b>CPI3_RAT</b>     | P05544                  | Serine protease inhibitor A3L                         | 186                 | 4.90E-15            |
| <b>CPI6_RAT</b>     | P09006                  | Serine protease inhibitor A3N                         | 89                  | 2.60E-05            |
| <b>CPSM_RAT</b>     | P07756                  | Carbamoyl-phosphate synthase [ammonia], mitochondrial | 223                 | 9.90E-19            |
| <b>CPT2_RAT</b>     | P18886                  | Carnitine O-palmitoyltransferase 2, mitochondrial     | 226                 | 4.90E-19            |
| <b>CRYAB_RAT</b>    | P23928                  | Alpha-crystallin B chain                              | 172                 | 1.20E-13            |
| <b>CY1_MOUSE</b>    | Q9D0M3                  | Cytochrome c1, heme protein, mitochondrial            | 82                  | 0.00012             |
| <b>DNJ5B_MOUSE</b>  | Q9CQ94                  | DnaJ homolog subfamily C member 5B                    | 58                  | 0.034               |
| <b>ECHA_RAT</b>     | Q64428                  | Trifunctional enzyme subunit alpha, mitochondrial     | 136                 | 4.90E-10            |
| <b>ECHM_RAT</b>     | P14604                  | Enoyl-CoA hydratase, mitochondrial                    | 103                 | 9.90E-07            |
| <b>EPHA3_MOUSE</b>  | P29319                  | Ephrin type-A receptor 3                              | 64                  | 0.008               |
| <b>ETFB_RAT</b>     | Q68FU3                  | Electron transfer flavoprotein subunit beta           | 124                 | 7.80E-09            |
| <b>EZRI_RAT</b>     | P31977                  | Ezrin                                                 | 70                  | 0.0021              |
| <b>FABPA_RAT</b>    | P70623                  | Fatty acid-binding protein, adipocyte                 | 185                 | 6.20E-15            |
| <b>FABPH_RAT</b>    | P07483                  | Fatty acid-binding protein, heart                     | 113                 | 9.90E-08            |
| <b>FTHFD_RAT</b>    | P28037                  | 10-formyltetrahydrofolate dehydrogenase               | 172                 | 1.20E-13            |
| <b>G3P_RAT</b>      | P04797                  | Glyceraldehyde-3-phosphate dehydrogenase              | 114                 | 7.80E-08            |
| <b>GANAB_MOUSE</b>  | Q8BHN3                  | Neutral alpha-glucosidase AB                          | 65                  | 0.0068              |
| <b>GRP75_RAT</b>    | P48721                  | Stress-70 protein, mitochondrial                      | 200                 | 2.00E-16            |
| <b>GUAD_RAT</b>     | Q9WTT6                  | Guanine deaminase                                     | 128                 | 3.10E-09            |
| <b>HBA_RAT</b>      | P01946                  | Hemoglobin subunit alpha-1/2                          | 77                  | 0.0004              |
| <b>HBB1_RAT</b>     | P02091                  | Hemoglobin subunit beta-1                             | 134                 | 7.80E-10            |
| <b>HBB2_RAT</b>     | P11517                  | Hemoglobin subunit beta-2                             | 81                  | 0.00016             |
| <b>HDAC2_MOUSE</b>  | P70288                  | Histone deacetylase 2                                 | 57                  | 0.042               |
| <b>HEMO_RAT</b>     | P20059                  | Hemopexin                                             | 152                 | 1.20E-11            |

*Mechanistic Insights into Nitrite-Induced Cardioprotection Using  
an Integrated Metabonomic-Proteomic Approach*

| <b>SwissProt ID</b> | <b>Accession Number</b> | <b>Protein Name</b>                                                          | <b>Mascot Score</b> | <b>Expect Value</b> |
|---------------------|-------------------------|------------------------------------------------------------------------------|---------------------|---------------------|
| <b>HS90B_RAT</b>    | P34058                  | Heat shock protein HSP 90-beta                                               | 147                 | 3.90E-11            |
| <b>HSP7C_CRIGR</b>  | P19378                  | Heat shock cognate 71 kDa protein                                            | 73                  | 0.001               |
| <b>HSPB1_RAT</b>    | P42930                  | Heat shock protein beta-1                                                    | 63                  | 0.01                |
| <b>IDH3B_RAT</b>    | Q68FX0                  | Isocitrate dehydrogenase [NAD] subunit beta, mitochondrial                   | 72                  | 0.0013              |
| <b>IQCB1_MOUSE</b>  | Q8BP00                  | IQ calmodulin-binding motif-containing protein 1                             | 66                  | 0.0053              |
| <b>IVD_RAT</b>      | P12007                  | Isovaleryl-CoA dehydrogenase, mitochondrial                                  | 81                  | 0.00018             |
| <b>K1C14_RAT</b>    | Q6IFV1                  | Keratin, type I cytoskeletal 14                                              | 74                  | 0.00077             |
| <b>KPYM_RAT</b>     | P11980                  | Pyruvate kinase isozymes M1/M2                                               | 82                  | 0.00012             |
| <b>LDHB_RAT</b>     | P42123                  | L-lactate dehydrogenase B chain                                              | 225                 | 6.20E-19            |
| <b>LONM_RAT</b>     | Q924S5                  | Lon protease homolog, mitochondrial                                          | 185                 | 6.20E-15            |
| <b>MUG1_RAT</b>     | Q03626                  | Murinoglobulin-1                                                             | 181                 | 1.60E-14            |
| <b>MUG2_RAT</b>     | Q6IE52                  | Murinoglobulin-2                                                             | 101                 | 1.60E-06            |
| <b>MVP_RAT</b>      | Q62667                  | Major vault protein                                                          | 189                 | 2.50E-15            |
| <b>MYG_RAT</b>      | Q9QZ76                  | Myoglobin                                                                    | 86                  | 5.30E-05            |
| <b>MYH4_RAT</b>     | Q29RW1                  | Myosin-4                                                                     | 64                  | 0.0072              |
| <b>MYH8_MOUSE</b>   | P13542                  | Myosin-8                                                                     | 62                  | 0.013               |
| <b>NALP6_MOUSE</b>  | Q91WS2                  | NACHT, LRR and PYD domains-containing protein 6                              | 63                  | 0.011               |
| <b>NDKA_RAT</b>     | Q05982                  | Nucleoside diphosphate kinase A                                              | 59                  | 0.026               |
| <b>NDKB_RAT</b>     | P19804                  | Nucleoside diphosphate kinase B                                              | 121                 | 1.60E-08            |
| <b>NDUAA_RAT</b>    | Q561S0                  | NADH dehydrogenase [ubiquinone] 1 alpha subcomplex subunit 10, mitochondrial | 208                 | 3.10E-17            |
| <b>NDUS1_RAT</b>    | Q66HF1                  | NADH-ubiquinone oxidoreductase 75 kDa subunit, mitochondrial                 | 295                 | 6.20E-26            |
| <b>NRAP_MOUSE</b>   | Q80XB4                  | Nebulin-related-anchoring protein                                            | 67                  | 0.0041              |
| <b>ODO1_RAT</b>     | Q5XI78                  | 2-oxoglutarate dehydrogenase E1 component, mitochondrial                     | 290                 | 2.00E-25            |

***Mechanistic Insights into Nitrite-Induced Cardioprotection Using  
an Integrated Metabonomic-Proteomic Approach***

| <b>SwissProt ID</b> | <b>Accession Number</b> | <b>Protein Name</b>                                                                                              | <b>Mascot Score</b> | <b>Expect Value</b> |
|---------------------|-------------------------|------------------------------------------------------------------------------------------------------------------|---------------------|---------------------|
| <b>ODO2_RAT</b>     | Q01205                  | Dihydrolipoyllysine-residue succinyltransferase component of 2-oxoglutarate dehydrogenase complex, mitochondrial | 63                  | 0.0099              |
| <b>ODP2_RAT</b>     | P08461                  | Dihydrolipoyllysine-residue acetyltransferase component of pyruvate dehydrogenase complex, mitochondrial         | 118                 | 3.10E-08            |
| <b>ODPB_RAT</b>     | P49432                  | Pyruvate dehydrogenase E1 component subunit beta, mitochondrial                                                  | 102                 | 1.20E-06            |
| <b>OVGP1_MOUSE</b>  | Q62010                  | Oviduct-specific glycoprotein                                                                                    | 59                  | 0.028               |
| <b>PCCA_RAT</b>     | P14882                  | Propionyl-CoA carboxylase alpha chain, mitochondrial                                                             | 194                 | 7.80E-16            |
| <b>PDIA1_RAT</b>    | P04785                  | Protein disulfide-isomerase                                                                                      | 202                 | 1.20E-16            |
| <b>PDIA3_RAT</b>    | P11598                  | Protein disulfide-isomerase A3                                                                                   | 221                 | 1.60E-18            |
| <b>PEBP1_RAT</b>    | P31044                  | Phosphatidylethanolamine-binding protein 1                                                                       | 81                  | 0.00016             |
| <b>PGAM1_MOUSE</b>  | Q9DBJ1                  | Phosphoglycerate mutase 1                                                                                        | 73                  | 0.00094             |
| <b>PIMT_RAT</b>     | P22062                  | Protein-L-isoaspartate(D-aspartate) O-methyltransferase                                                          | 57                  | 0.042               |
| <b>PKHA4_RAT</b>    | P60669                  | Pleckstrin homology domain-containing family A member 4                                                          | 60                  | 0.022               |
| <b>PRDX1_RAT</b>    | Q63716                  | Peroxiredoxin-1                                                                                                  | 146                 | 4.90E-11            |
| <b>PRDX2_MOUSE</b>  | Q61171                  | Peroxiredoxin-2                                                                                                  | 58                  | 0.033               |
| <b>PRDX6_RAT</b>    | O35244                  | Peroxiredoxin-6                                                                                                  | 68                  | 0.0034              |
| <b>PSA1_RAT</b>     | P18420                  | Proteasome subunit alpha type-1                                                                                  | 99                  | 2.60E-06            |
| <b>PSA5_MOUSE</b>   | Q9Z2U1                  | Proteasome subunit alpha type-5                                                                                  | 70                  | 0.0019              |
| <b>PYC_RAT</b>      | P52873                  | Pyruvate carboxylase, mitochondrial                                                                              | 174                 | 7.80E-14            |
| <b>RB11B_MOUSE</b>  | P46638                  | Ras-related protein Rab-11B                                                                                      | 65                  | 0.0058              |
| <b>REM1_MOUSE</b>   | O35929                  | GTP-binding protein REM 1                                                                                        | 56                  | 0.047               |
| <b>SCOT_MOUSE</b>   | Q9D0K2                  | Succinyl-CoA:3-ketoacid-coenzyme A transferase 1, mitochondrial                                                  | 77                  | 0.00038             |
| <b>SPA3K_RAT</b>    | P05545                  | Serine protease inhibitor A3K                                                                                    | 154                 | 7.80E-12            |

*Mechanistic Insights into Nitrite-Induced Cardioprotection Using  
an Integrated Metabonomic-Proteomic Approach*

| SwissProt ID | Accession Number | Protein Name                                           | Mascot Score | Expect Value |
|--------------|------------------|--------------------------------------------------------|--------------|--------------|
| SUOX_RAT     | Q07116           | Sulfite oxidase, mitochondrial                         | 152          | 1.20E-11     |
| TBB2C_MOUSE  | P68372           | Tubulin beta-2C chain                                  | 74           | 0.00075      |
| TBX3_RAT     | Q7TST9           | T-box transcription factor TBX3                        | 56           | 0.051        |
| TCPE_RAT     | Q68FQ0           | T-complex protein 1 subunit epsilon                    | 103          | 9.90E-07     |
| TCPG_MOUSE   | P80318           | T-complex protein 1 subunit gamma                      | 56           | 0.048        |
| TPIS_RAT     | P48500           | Triosephosphate isomerase                              | 170          | 2.00E-13     |
| TPM1_MOUSE   | P58771           | Tropomyosin alpha-1 chain                              | 166          | 4.90E-13     |
| TPM2_MOUSE   | P58774           | Tropomyosin beta chain                                 | 88           | 2.90E-05     |
| TPM3_MOUSE   | P21107           | Tropomyosin alpha-3 chain                              | 70           | 0.0019       |
| TRFE_RAT     | P12346           | Serotransferrin                                        | 219          | 2.50E-18     |
| UBE1X_MOUSE  | Q02053           | Ubiquitin-like modifier-activating enzyme 1 X          | 81           | 0.00015      |
| UCRI_RAT     | P20788           | Cytochrome b-c1 complex subunit Rieske, mitochondrial  | 103          | 9.90E-07     |
| VINC_MOUSE   | Q64727           | Vinculin                                               | 248          | 3.10E-21     |
| VPS41_MOUSE  | Q5KU39           | Vacuolar protein sorting-associated protein 41 homolog | 66           | 0.0051       |
| VTDB_RAT     | P04276           | Vitamin D-binding protein                              | 151          | 1.60E-11     |

**Table 1.** Spots from mitochondrial and post-mitochondrial cytoplasm 2D-gels were subjected to trypsin digestion, MALDI-TOF MS and Mascot™ PMF analyses, as described, to build a roadmap of identified protein spots across the gels. The SwissProt rat proteomic database was used, except in circumstances where a database assignment could not be made, in which case the mouse proteomic database was used. Shown are the SwissProt ID and accession numbers, the gene names, the Mascot™ scores and expect values for each protein hit. The threshold for assignments was drawn at an expect value of 0.05, corresponding to a false discovery rate of 5%.

*Mechanistic Insights into Nitrite-Induced Cardioprotection Using  
an Integrated Metabonomic-Proteomic Approach*

**Table 2. Summary of Observed Nitrite-Dependent Proteomic Alterations**

| Name of Protein (or Family)          | Observed Nitrite-Dependent Alteration | Figure and Spot of Reference | Apparent Expression |           |         |          | Method of Analysis                  |
|--------------------------------------|---------------------------------------|------------------------------|---------------------|-----------|---------|----------|-------------------------------------|
|                                      |                                       |                              | Control             | 0.1 mg/kg | 1 mg/kg | 10 mg/kg |                                     |
| Protein Disulfide Isomerase A3       | Migration in pI                       | Fig. 3Bi: spot a             | +++                 | +         | ++      | ++       | 2D-PAGE, gel staining, PMF analysis |
|                                      |                                       | Fig. 3Bi: spot b             | ++++                | +         | ++++    | ++       |                                     |
|                                      |                                       | Fig. 3Bi: spot c             | +                   | ++        | ++      | ++       |                                     |
|                                      |                                       | Fig. 3Bi: spot d             | ++                  | ++++      | ++++    | ++++     |                                     |
| Ubiquinone Biosynthesis Protein CoQ9 | Migration in pI                       | Fig. 3Bii: spot a            | ++                  | +         | +++     | +++      | 2D-PAGE, gel staining, PMF analysis |
|                                      |                                       | Fig. 3Bii: spot b            | +++                 | ++        | ++++    | ++++     |                                     |
|                                      |                                       | Fig. 3Bii: spot c            | +                   | ++        | ++      | +        |                                     |
|                                      |                                       | Fig. 3Bii: spot d            | +++                 | ++++      | ++++    | +        |                                     |
| Aldehyde Dehydrogenase 2             | Migration in pI                       | Fig. 3Biii: spot a           | +                   | +++       | ++++    | +++      | 2D-PAGE, gel staining, PMF analysis |
|                                      |                                       | Fig. 3Biii: spot b           | ++                  | ++        | +++     | ++       |                                     |
|                                      |                                       | Fig. 3Biii: spot c           | ++++                | ++++      | ++++    | ++++     |                                     |
|                                      |                                       | Fig. 3Biii: spot d           | ++                  | ++        | +++     | ++       |                                     |
|                                      |                                       | Fig. 3Biii: spot e           | ++++                | ++        | +++     | +++      |                                     |
| Myosin Light Chain Isoforms          | Migration in pI                       | Fig. 4A: spot a              | ++                  | ++        | ++      | ^+       | 2D-PAGE, gel staining, PMF analysis |
|                                      |                                       | Fig. 4A: spot b              | ++                  | ++        | ++      | +++      |                                     |
|                                      |                                       | Fig. 4A: spot c              | +++                 | +++       | +++     | ++++     |                                     |
|                                      |                                       | Fig. 4A: spot d              | ++                  | ++        | ++      | ++       |                                     |
|                                      |                                       | Fig. 4A: spot e              | ++                  | ++        | ++      | ++       |                                     |
|                                      |                                       | Fig. 4A: spot f              | +++                 | ++        | +++     | ++++     |                                     |
|                                      |                                       | Fig. 4A: spot g              | +++                 | ++        | ++      | ++       |                                     |



*Mechanistic Insights into Nitrite-Induced Cardioprotection Using  
an Integrated Metabonomic-Proteomic Approach*

| Name of Protein (or Family)                 | Observed Nitrite-Dependent Alteration | Figure and Spot of Reference | Apparent Expression |           |         |          | Method of Analysis                          |
|---------------------------------------------|---------------------------------------|------------------------------|---------------------|-----------|---------|----------|---------------------------------------------|
|                                             |                                       |                              | Control             | 0.1 mg/kg | 1 mg/kg | 10 mg/kg |                                             |
| Cardiac $\alpha$ -actin                     | Migration in pI                       | Fig. 4B: spot a              | +++                 | +         | +++     | +++      | 2D-PAGE, gel staining, PMF analysis         |
|                                             |                                       | Fig. 4B: spot b              | +++                 | ++        | +++     | +++      |                                             |
|                                             |                                       | Fig. 4B: spot c              | +++                 | ++++      | +++     | +++      |                                             |
|                                             |                                       | Fig. 4B: spot d              | +++                 | ++++      | ++++    | +++      |                                             |
|                                             |                                       | Fig. 4B: spot e              | +++                 | +++       | +++     | +++      |                                             |
| Lactate Dehydrogenase B                     | Nitration                             | Fig. 4C: spot a              | ++                  | +++       | ++++    | ++++     | 2D-PAGE Western, gel staining, PMF analysis |
| Pyruvate Dehydrogenase Complex Component E2 | Nitration                             | Fig. 4C: spot b              | +++                 | ++        | +++     | +++      | 2D-PAGE Western, gel staining, PMF analysis |
| Cardiac $\alpha$ -actin                     | Nitration                             | Fig. 4C: spot c              | +++                 | ++        | +++     | +++      | 2D-PAGE Western, gel staining, PMF analysis |
| Unidentified                                | Nitration                             | Fig. 4C: spot d              | +++                 | +         | ++      | +++      | 2D-PAGE Western, gel staining, PMF analysis |
| Unidentified                                | Nitration                             | Fig. 4C: spot e              | +                   | +         | ++      | +++      | 2D-PAGE Western, gel staining, PMF analysis |

***Mechanistic Insights into Nitrite-Induced Cardioprotection Using  
an Integrated Metabonomic-Proteomic Approach***

| Name of Protein (or Family)             | Observed Nitrite-Dependent Alteration | Figure and Spot of Reference | Apparent Expression |                        | Method of Analysis               |
|-----------------------------------------|---------------------------------------|------------------------------|---------------------|------------------------|----------------------------------|
|                                         |                                       |                              | Control             | Pooled Nitrite Treated |                                  |
| Filamin-C                               | Phosphorylation                       | Fig. 5A                      | +                   | +++                    | Phosphopeptide enrichment, LC-MS |
| cAMP-dependent Protein Kinase           | Phosphorylation                       | Fig. 5B                      | +                   | +++                    | Phosphopeptide enrichment, LC-MS |
| Serine/threonine Protein Phosphatase 2A | Phosphorylation                       | Fig. 5C                      | +                   | +++                    | Phosphopeptide enrichment, LC-MS |

**Table 2.** Nitrite-treatment dependent proteomic alterations observed in this study. Given are names of proteins or protein families (when precise protein isoform was not distinguished), observed alterations, references to figures and gel spots upon which these observations were made, apparent relative changes in expression levels of each of these species, and the methods of analysis that were used in each case. Relative expression levels: +, low to undetectable; ++, medium-low; +++, medium-high; +++++, high.
